# Supplementary material for: Prognostic Impact of In-Hospital Use of Mechanical Cardiopulmonary Resuscitation Devices Compared with Manual Cardiopulmonary Resuscitation: A Nationwide Population-Based Observational Study in South Korea
Source: Medicina (Kaunas). 2022 Feb 27;58(3):353. doi: 10.3390/medicina58030353 (PMC8954998; doi:10.3390/medicina58030353)
Supplement: Supplementary file 1 [file medicina-58-00353-s001.zip › medicina-1603659-supplementary.pdf]

# Supplementary Materials

**Table S1.** Unmatched univariate analysis for three types of mechanical CPR devices.

**Table S1.** Unmatched univariate analysis for three types of mechanical CPR devices.

| Devices               | AutoPulse™               |                           |                  | Thumper™                 |                           |                   | LUCAS™                   |                           |                   |
|-----------------------|--------------------------|---------------------------|------------------|--------------------------|---------------------------|-------------------|--------------------------|---------------------------|-------------------|
|                       | Manual CPR<br>N = 19,045 | Mechanical CPR<br>N = 671 | <i>p</i> -value* | Manual CPR<br>N = 19,045 | Mechanical CPR<br>N = 305 | <i>p</i> -value*  | Manual CPR<br>N = 19,045 | Mechanical CPR<br>N = 149 | <i>p</i> -value*  |
| Age, years            | 67.0 (55.0-77.0)         | 69.0 (57.0-78.0)          | 0.016            | 67.0 (55.0-77.0)         | 71.0 (56.0-78.0)          | 0.099             | 67.0 (55.0-77.0)         | 70.0 (56.0-78.0)          | 0.249             |
| Male                  | 12,911 (67.8%)           | 445 (66.3%)               | 0.447            | 12,911 (67.8%)           | 205 (67.2%)               | 0.878             | 12,911 (67.8%)           | 101 (67.8%)               | 1.000             |
| Witnessed             | 11,725 (61.6%)           | 422 (62.9%)               | 0.513            | 11,725 (61.6%)           | 184 (60.3%)               | 0.703             | 11,725 (61.6%)           | 95 (63.8%)                | 0.643             |
| Place                 |                          |                           | 0.349            |                          |                           | 0.403             |                          |                           | 0.427             |
| Non-public            | 15,260 (80.1%)           | 548 (81.7%)               |                  | 15,260 (80.1%)           | 238 (78.0%)               |                   | 15,260 (80.1%)           | 115 (77.2%)               |                   |
| Public                | 3,785 (19.9%)            | 123 (18.3%)               |                  | 3,785 (19.9%)            | 67 (22.0%)                |                   | 3,785 (19.9%)            | 34 (22.8%)                |                   |
| Bystander CPR         | 4,814 (25.3%)            | 191 (28.5%)               | 0.069            | 4,814 (25.3%)            | 80 (26.2%)                | 0.754             | 4,814 (25.3%)            | 53 (35.6%)                | <b>0.005</b>      |
| Arrest cause          |                          |                           | 0.577            |                          |                           | 0.483             |                          |                           | 0.141             |
| Cardiac               | 17,292 (90.8%)           | 614 (91.5%)               |                  | 17,292 (90.8%)           | 281 (92.1%)               |                   | 17,292 (90.8%)           | 141 (94.6%)               |                   |
| Non-cardiac           | 1,753 (9.2%)             | 57 (8.5%)                 |                  | 1,753 (9.2%)             | 24 (7.9%)                 |                   | 1,753 (9.2%)             | 8 (5.4%)                  |                   |
| Arrest rhythm         |                          |                           | 0.010            |                          |                           | 0.330             |                          |                           | 0.763             |
| Non-shockable         | 15,343 (80.6%)           | 568 (84.6%)               |                  | 15,343 (80.6%)           | 253 (83.0%)               |                   | 15,343 (80.6%)           | 122 (81.9%)               |                   |
| Shockable             | 3,702 (19.4%)            | 103 (15.4%)               |                  | 3,702 (19.4%)            | 52 (17.0%)                |                   | 3,702 (19.4%)            | 27 (18.1%)                |                   |
| PCI                   | 650 (3.4%)               | 10 (1.5%)                 | 0.009            | 650 (3.4%)               | 6 (2.0%)                  | 0.221             | 650 (3.4%)               | 8 (5.4%)                  | 0.280             |
| TTM                   | 1,173 (6.2%)             | 47 (7.0%)                 | 0.417            | 1,173 (6.2%)             | 9 (3.0%)                  | <b>0.028</b>      | 1,173 (6.2%)             | 14 (9.4%)                 | 0.143             |
| Pacemaker             | 187 (1.0%)               | 0 (0.0%)                  | 0.017            | 187 (1.0%)               | 3 (1.0%)                  | 1.000             | 187 (1.0%)               | 1 (0.7%)                  | 1.000             |
| ECMO                  | 389 (2.0%)               | 19 (2.8%)                 | 0.203            | 389 (2.0%)               | 4 (1.3%)                  | 0.488             | 389 (2.0%)               | 11 (7.4%)                 | <b>&lt; 0.001</b> |
| Sustained ROSC        | 7,606 (39.9%)            | 203 (30.3%)               | <b>&lt;0.001</b> | 7,606 (39.9%)            | 62 (20.3%)                | <b>&lt; 0.001</b> | 7,606 (39.9%)            | 41 (27.5%)                | <b>0.003</b>      |
| Survival to discharge | 1,376 (7.2%)             | 33 (4.9%)                 | 0.028            | 1,376 (7.2%)             | 10 (3.3%)                 | <b>0.011</b>      | 1,376 (7.2%)             | 4 (2.7%)                  | <b>0.048</b>      |

Categorical and continuous variables are represented by a number (%) and median (interquartile range), respectively. Acronyms: CPR, cardiopulmonary resuscitation; PCI, percutaneous coronary intervention; TTM, target temperature management; ECMO, extracorporeal cardiopulmonary support; and ROSC, return of spontaneous circulation.

\*Calculated by Mann–Whitney test for continuous variables, and Chi-squared or Fisher’s exact test for categorical variables.
